# Supplementary material for: Interaction of glycated protein and DFO mimicked hypoxia in cellular responses of HUVECs
Source: Royal Society of Chemistry journal article supplement (doi:10.1039/c2mb25156f), 2012-06-21
Supplement: c2mb25156f.pdf [file c2mb25156f.pdf]

Figure legend for supplemental file:

XTT assay : Absorbance at 450nm for different concentration of DFO 100 and 200  $\mu$ M

and AGE-HSA at 0.2 and 2.0 mg/ml concentration ; n=3, mean  $\pm$  SD
