# Supplementary figures and images for: Interaction of glycated protein and DFO mimicked hypoxia in cellular responses of HUVECs
Source: Royal Society of Chemistry journal article supplement (doi:10.1039/c2mb25156f), 2012-06-21

Absorbance at 450nm

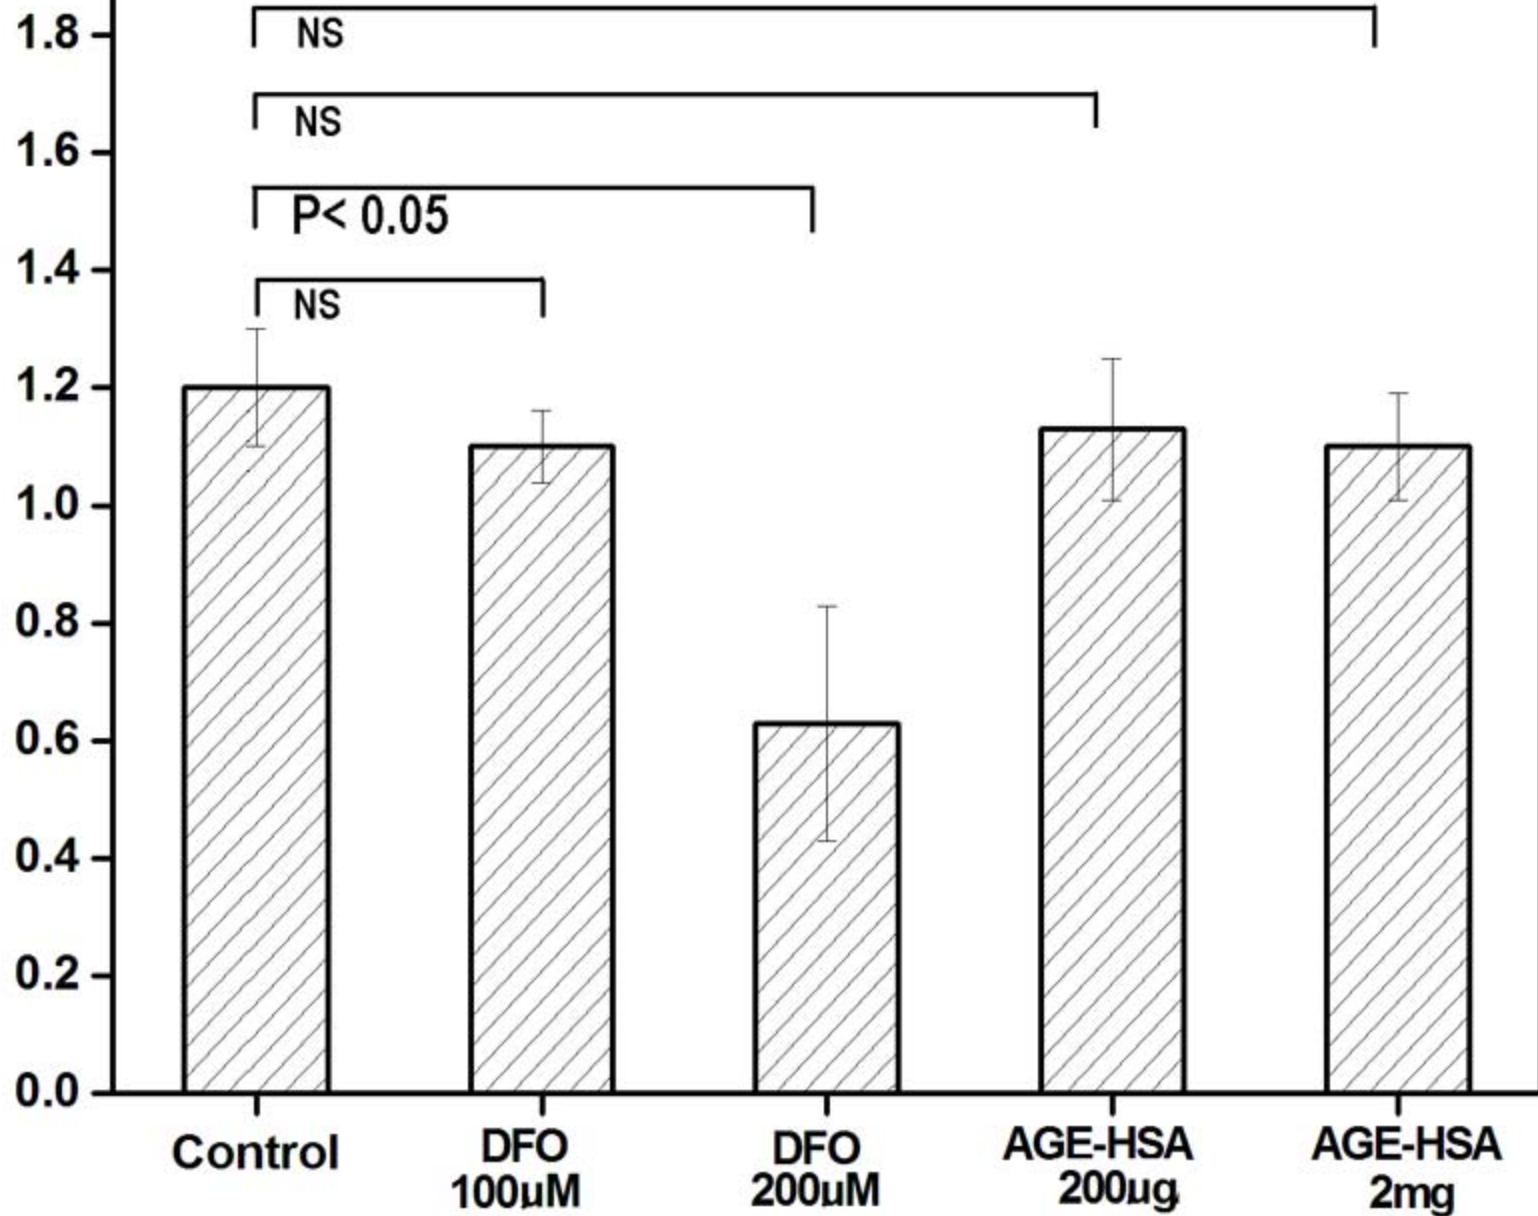

Supplement: c2mb25156f_2.pdf [file c2mb25156f_2.pdf]
